# Supplementary material for: Low-cost p-type dye-sensitized solar cells based on Dawson-type transition metal-substituted polyoxometalate inorganic co-sensitizers
Source: Royal Society of Chemistry journal article supplement (doi:10.1039/c7qi00160f), 2017-01-01
Supplement: c7qi00160f1.pdf [file c7qi00160f1.pdf]

## Supporting Information

### **Low-cost p-type dye-sensitized solar cells based on Dawson-type transition-metal-substituted polyoxometalates inorganic cosensitizers**

Xiang-Wei Guo, Xiao-Hong Li, Zhu-Jun Liu, Wei-Lin Chen\*, Xiao-Tao Zheng, En-Bo Wang\*, Zhong-Min Su

Key Laboratory of Polyoxometalate Science of Ministry of Education, Department of Chemistry, Northeast Normal University, Changchun, Jilin 130024, P.R. China

### **Experimental Section**

#### **Material Preparation**

All the reagents and chemicals were purchased commercially and used without further purification.  $P_2W_{17}Co$  and  $P_2W_{17}Mn$  were synthesized according to the reported method<sup>S1</sup>.

#### **Solar Cell Fabrication**

FTO conductive glass was ultrasonically cleaned with surfactant, isopropanol, ethanol and dried with  $N_2$ . The photocathode film was prepared by screen-printing NiO paste on the clean substrate. Three layers of paste was deposited on the FTO glass to control the thickness of NiO working electrode. Layers then sintered at 350 °C for 5 min, 400 °C for 5 min, and 450 °C for 30 min. When cooled to room temperature, the film was immersed in 0.03 M  $P_2W_{17}Co$  DMSO solution, 0.03 M  $P_2W_{17}Mn$  DMSO solution and a mixture DMSO solution of 0.03 M  $P_2W_{17}Co$  with 0.015 M  $P_2W_{17}Mn$  for 24 h, followed by rinsing with ethanol and drying with  $N_2$ . The electrolyte is

composed of 1.0 M LiI and 0.1 M I<sub>2</sub> in anhydrous acetonitrile. The solar cells were assembled by sandwiching a Pt counter electrode and a polyoxometalate photosensitizer sensitized photocathode. The electrolyte solution was then filled through the holes predrilled on the Pt electrode by applying vacuum. Afterward the holes were sealed with glass cover slide.

### **Characterization Methods**

The UV-Vis spectra test were recorded on a Varian Cary 50 conc UV-Visible spectrophotometer in the range of 350-800nm. IR spectra were recorded using KBr pellets on a Bruker AXS TENSOR-27 FTIR spectrometer in the range of 4000–400 cm<sup>-1</sup>. TG curves were performed on a PerkinElmer TGA7 instrument at a heating rate of 10 °C/min from 25 °C to 600 °C. The diffuse reflectivity spectra were collected on a UV-2600 SHIMADZU UV-vis spectrophotometer in reflectance mode, which was measured from 220 nm to 850 nm using barium sulfate (BaSO<sub>4</sub>) as a standard with 100% reflectance. Cyclic voltammograms were recorded on a CHI601D Electrochemical Workstation (Shanghai Chenhua Instrument Corp., China) at room temperature, using a glassy carbon electrode as the working electrode, a Pt wire as the counter electrode and a Ag/Ag<sup>+</sup> reference electrode. 0.1 M LiClO<sub>4</sub> was used as the supporting electrolyte. X-ray spectroscopy (EDS) of the samples was obtained from FEI Quanta 200 F microscope operated at an accelerating voltage of 20 kV. A Keithley 2400 source meter and a Zolix Omni-300 monochromator equipped with a 500 W xenon lamp were used for photocurrent action spectrum measurements, with a wavelength sampling interval of 10 nm and a current sampling time of 2 s under the

full computer control. J–V characteristics and other photoelectrochemical experiments were performed on a CHI601D electrochemical workstation at room temperature equipped with the xenon lamp as the light source and an AM 1.5 solar filter.

### Supplementary Physical and Chemical Characterizations

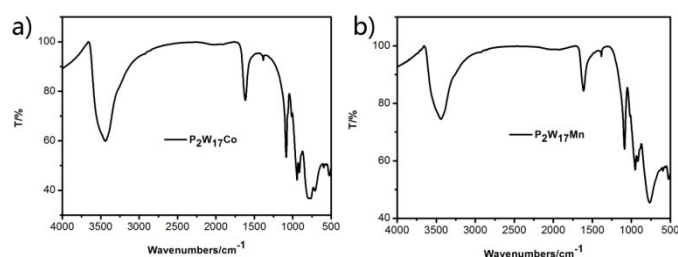

**Figure. S1** IR spectra of  $P_2W_{17}Co$ (a) and  $P_2W_{17}Mn$ (b).

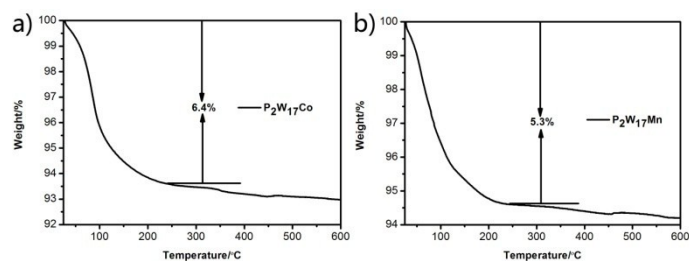

**Figure. S2** TG analysis of  $P_2W_{17}Co$ (a) and  $P_2W_{17}Mn$ (b).

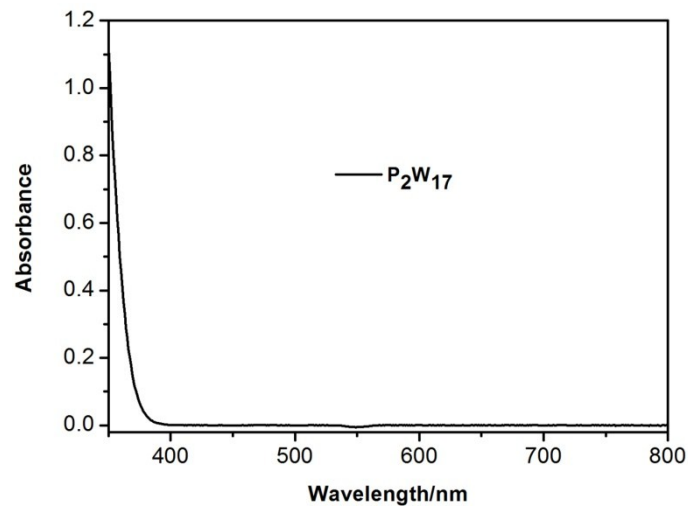

Fig. S3. the UV-vis spectrum of 1mM  $K_{10}[\alpha_2-P_2W_{17}O_{61}]$  in DMSO.

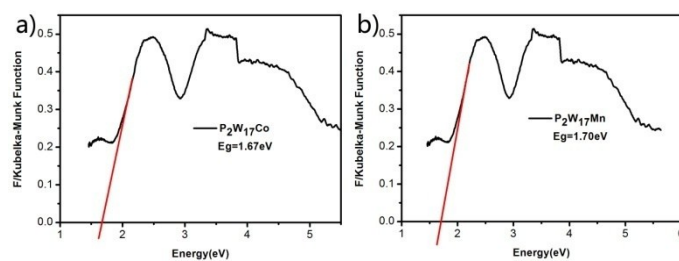

**Figure. S4** Diffuse reflectivity spectra and plot of Kubelka–Munk function  $F$  against energy  $E$  of  $P_2W_{17}Co$ (a) and  $P_2W_{17}Mn$ (b).

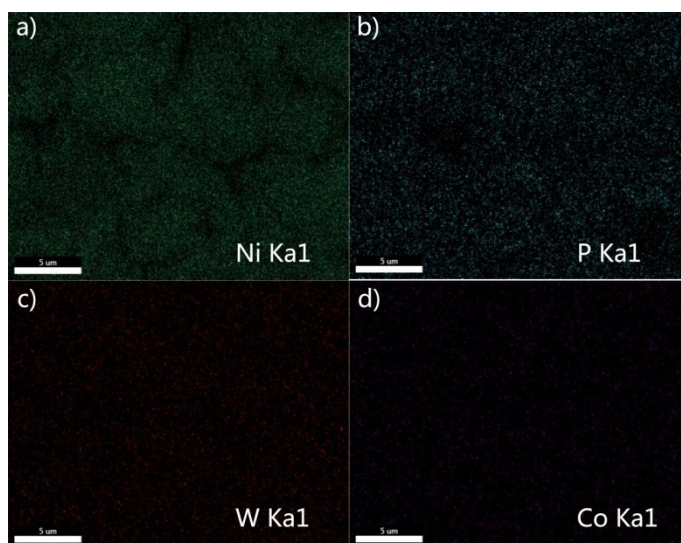

**Figure. S5** Element mapping of  $P_2W_{17}Co$  sensitized NiO electrode.

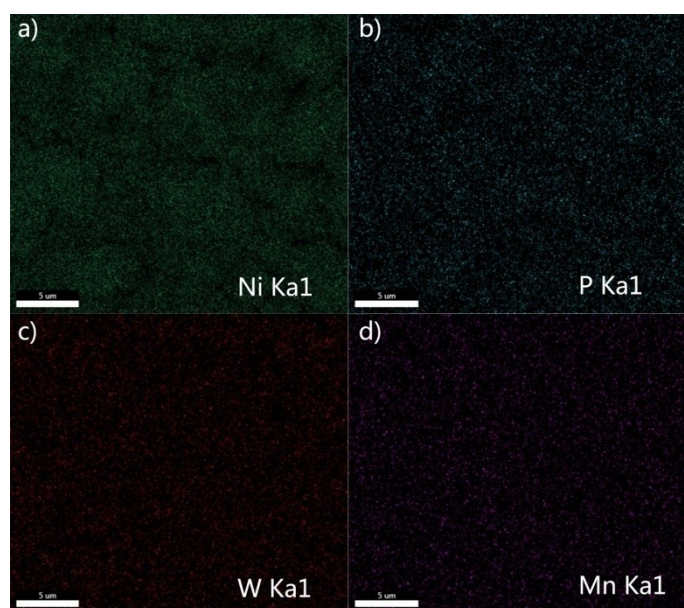

**Figure. S6** Element mapping of  $P_2W_{17}Mn$  sensitized NiO electrode.

**Table. S1** Parameters of photovoltaic performance for different dyes measured under 100 mW/cm<sup>2</sup> simulated AM1.5G irradiation based on mesoporous NiO electrodes.

| Dye                                                              | Electrolyte                             | $V_{oc}$ (mV) | $J_{sc}$ (mA/cm <sup>2</sup> ) | FF   | PCE(%) | Reference |
|------------------------------------------------------------------|-----------------------------------------|---------------|--------------------------------|------|--------|-----------|
| erythrosine B                                                    | $I_3^-/I^-$                             | 82.8          | 0.232                          | 0.27 | 0.0076 | S2        |
| C343                                                             | $I_3^-/I^-$                             | 70            | 0.78                           | 0.32 | 0.017  | S3        |
| P1                                                               |                                         | 110           | 1.52                           | 0.31 | 0.052  |           |
| P4                                                               | $I_3^-/I^-$                             | 100           | 2.48                           | 0.36 | 0.09   | S4        |
| [Ru(dcb) <sub>2</sub> (NMI-phen)](PF <sub>6</sub> ) <sub>2</sub> | $I_3^-/I^-$                             | 95            | 0.16                           | 0.36 | 0.006  | S5        |
| IrPhen                                                           | Co(dtbpy) <sub>3</sub> <sup>3+/2+</sup> | 345           | 0.14                           | 0.44 | 0.021  | S6        |
| IrDPQCN2                                                         |                                         | 508           | 0.25                           | 0.54 | 0.068  |           |
| IrBpystyryl                                                      |                                         | 383           | 0.37                           | 0.44 | 0.061  |           |
| PMI-6T-TPA                                                       | $I_3^-/I^-$                             | 218           | 5.35                           | 0.35 | 0.41   | S7        |
| O2                                                               | $I_3^-/I^-$                             | 94            | 1.43                           | 0.37 | 0.050  | S8        |
| O6                                                               |                                         | 97            | 1.04                           | 0.37 | 0.037  |           |

|     |             |    |      |      |       |     |
|-----|-------------|----|------|------|-------|-----|
| O7  |             | 90 | 1.74 | 0.38 | 0.060 |     |
| O8  | $I_3^-/I^-$ | 63 | 0.44 | 0.36 | 0.009 | S8  |
| O11 |             | 79 | 1.16 | 0.36 | 0.033 |     |
| O12 |             | 92 | 1.84 | 0.34 | 0.051 |     |
| O3  | $I_3^-/I^-$ | 93 | 3.04 | 0.35 | 0.099 | S10 |
| O13 |             | 89 | 2.66 | 0.31 | 0.074 |     |
| O17 |             | 92 | 2.69 | 0.34 | 0.085 |     |

**Table. S2** Photovoltaic parameters of a batch of 9 devices measured under 100 mW/cm<sup>2</sup> simulated AM1.5G irradiation based on mesoporous NiO electrodes.

| 100%Sun                        | 0.03MP <sub>2</sub> W <sub>17</sub> Co + 0.015MP <sub>2</sub> W <sub>17</sub> Mn |        |        |
|--------------------------------|----------------------------------------------------------------------------------|--------|--------|
|                                | Cell-1                                                                           | Cell-2 | Cell-3 |
| $V_{oc}$ (mV)                  | 102                                                                              | 100    | 102    |
| $J_{sc}$ (mA/cm <sup>2</sup> ) | 1.51                                                                             | 1.51   | 1.49   |
| FF                             | 0.299                                                                            | 0.307  | 0.305  |
| PCE(%)                         | 0.0461                                                                           | 0.0464 | 0.0464 |
| 100%Sun                        | 0.03M P <sub>2</sub> W <sub>17</sub> Co                                          |        |        |
|                                | Cell-1                                                                           | Cell-2 | Cell-3 |
| $V_{oc}$ (mV)                  | 100                                                                              | 103    | 102    |
| $J_{sc}$ (mA/cm <sup>2</sup> ) | 1.3                                                                              | 1.25   | 1.49   |
| FF                             | 0.301                                                                            | 0.32   | 0.305  |
| PCE(%)                         | 0.0391                                                                           | 0.0412 | 0.0464 |
| 100%Sun                        | 0.03M P <sub>2</sub> W <sub>17</sub> Mn                                          |        |        |
|                                | Cell-1                                                                           | Cell-2 | Cell-3 |
| $V_{oc}$ (mV)                  | 87                                                                               | 82     | 84     |
| $J_{sc}$ (mA/cm <sup>2</sup> ) | 1.21                                                                             | 1.279  | 1.268  |
| FF                             | 0.302                                                                            | 0.299  | 0.296  |
| PCE(%)                         | 0.0318                                                                           | 0.0314 | 0.0315 |

**Table. S3** Parameters of photovoltaic performance for  $P_2W_{17}Mn$  of different concentrations measured under 100 mW/cm<sup>2</sup> simulated AM1.5G irradiation based on mesoporous NiO electrodes.

| $P_2W_{17}Mn$ | $V_{oc}(mV)$ | $J_{sc}(mA/cm^2)$ | FF    | PCE(%) |
|---------------|--------------|-------------------|-------|--------|
| 0.015 M       | 83           | 1.144             | 0.297 | 0.0282 |
| 0.020 M       | 84           | 1.188             | 0.290 | 0.0289 |
| 0.025 M       | 85           | 1.201             | 0.289 | 0.0295 |
| 0.030 M       | 84           | 1.268             | 0.296 | 0.0315 |
| 0.035 M       | 83           | 1.255             | 0.292 | 0.304  |
| 0.040 M       | 85           | 1.187             | 0.298 | 0.0300 |

**Table. S4** Optimzation of concentrations of  $P_2W_{17}Co$  and  $P_2W_{17}Mn$ . Photovoltaic parameters of a batch of 6 devices measured under 100 mW/cm<sup>2</sup> simulated AM1.5G irradiation based on mesoporous NiO electrodes.

| $P_2W_{17}Co + P_2W_{17}Mn$ | $V_{oc}(mV)$ | $J_{sc}(mA/cm^2)$ | FF    | PCE(%) |
|-----------------------------|--------------|-------------------|-------|--------|
| 0.03 M + 0.005 M            | 100          | 1.31              | 0.302 | 0.0396 |
| 0.03 M + 0.010 M            | 102          | 1.38              | 0.299 | 0.0421 |
| 0.03 M + 0.015 M            | 101          | 1.48              | 0.31  | 0.0463 |
| 0.03 M + 0.020 M            | 98           | 1.478             | 0.304 | 0.044  |
| 0.03 M + 0.025 M            | 95           | 1.503             | 0.301 | 0.0428 |
| 0.03 M + 0.030 M            | 90           | 1.51              | 0.297 | 0.0404 |

## References

- S1 D. K. Lyon, W. K. Miller, T. Novet, P. J. Domaille, E. Evitt, D. C. Johnson and R. G. Finke, *J. Am. Chem. Soc.* 1991, **113**, 7209.

- S2 J. J. He, H. Lindström, A. Hagfeldt, S. E. Lindquist, *J. Phys. Chem. B*, 1999, **103**, 8940.
- S3 P. Qin, J. Zhu, T. Edvinsson, G. Boschloo, A. Hagfeldt, L. C. Sun, *J. Am. Chem. Soc.*, 2008, **130**, 8570.
- S4 P. Qin, M. Linder, T. Brinck, G. Boschloo, A. Hagfeldt, L. C., Sun, *Adv. Mater.*, 2009, **21**, 2993.
- S5 D'Amario, A. M. Browna, L. Hammarström, *Dalton Trans.*, 2012, **41**, 13105.
- S6 M. Gennari, F. Légalité, L. Zhang, Y. Pellegrin, E. Blart, J. Fortage, A. M. Brown, A. Deronzier, M. N Collomb, M. Boujtita, D. Jacquemin, L. Hammarström, F. Odobel, *J. Phys. Chem. Lett.*, 2014, **5**, 2254.
- S7 A. Nattestad, A. J. Mozer, M. K. R. Fischer, Y. B. Cheng, A. Mishra, P. Bäuerle, U. Bach, *Nature Materials*, 2010, **9**, 31.
- S8 Z. Q. Ji, G. Nau, Z. J. Huang and Y. Y. Wu, *Energy Environ. Sci.*, 2011, **4**, 2818.
- S9 Z. Q. Ji, G. Nau, Z. J. Huang, O. Kokhan and Y. Y. Wu, *J. Phys. Chem. C*, 2012, **116**, 16854.
- S10 Z. Q. Ji, G. Nau and Y. Y. Wu, *ACS Appl. Mater. Interfaces*, 2013, **5**, 8641.
